# Supplementary material
Source: HighWire-hosted journal article supplement (https://www.jneurosci.org/highwire/filestream/600733/field_highwire_adjunct_files/0/Supplemental_Material.pdf)
Supplement: Supplemental_Material.pdf [file Supplemental_Material.pdf]

**Supplemental Table 1: Gene identifiers for the proteins shown in Table 1.**

| <b>Protein Name</b>                                              | <b>Gene Identifier</b> |
|------------------------------------------------------------------|------------------------|
| <b>Oxidative stress</b>                                          |                        |
| Ferritin heavy polypeptide 1                                     | 66911979               |
| Thioredoxin reductase 1                                          | 55250051               |
| Prothymosin $\alpha$                                             | 62201921               |
| <b>Membrane-cytoskeletal signaling</b>                           |                        |
| Myristoylated alanine-rich C-kinase substrate-like 1, MARCKSL1   | 76363234               |
| Brain abundant membrane attached signal protein 1 (BASP1/CAP-23) | 730110                 |
| Gravin/A kinase anchor protein (AKAP12)                          | 75905811               |
| Tropomyosin 4 <sup>1</sup>                                       | 763182                 |
| Thymosin $\beta$ 4                                               | 78103212               |
| <b>Transcription regulation</b>                                  |                        |
| APEX nuclease                                                    | 624915                 |
| Y box binding protein 1 (YBX1)                                   | 92373398               |
| <b>Neuropeptide signaling</b>                                    |                        |
| CGRP precursor <sup>2</sup>                                      | 76880491               |
| Neurosecretory protein VGF <sup>3</sup>                          | 13591864               |

| <b>Other</b>                                              |          |
|-----------------------------------------------------------|----------|
| Diazepam binding inhibitor<br>(DBI)                       | 62201921 |
| Proteasome P20 subunit<br>(PSMB7)                         | 9719458  |
| $\alpha$ -Galactosidase                                   | 34881493 |
| Palmytoyl-protein thioesterase<br>1                       | 11968070 |
| Acetyl-Coenzyme A<br>acetyltransferase 2                  | 33086552 |
| Cell cycle exit and neuronal<br>differentiation 1 (CEND1) | 81882797 |
| LSM3 homolog, U6 small<br>nuclear RNA associated          | 27712626 |

**Supplemental Table 2: Colocalization of VGF-ir and TrkA-ir in DRG neurons**

|    |       | % VGF+ of Total           | % TrkA+ of Total | % TrkA+ of VGF+ |
|----|-------|---------------------------|------------------|-----------------|
| L4 | Naïve | 21.3 ± 2.4                | 46.8 ± 3.9       | 58.3 ± 4.5      |
|    | Sham  | 42.1 ± 2.6 <sup>a</sup>   | 49.6 ± 1.6       | 56.5 ± 3.2      |
|    | SNL   | 61.9 ± 5.3 <sup>a,b</sup> | 53.3 ± 4.7       | 53.3 ± 4.4      |
| L5 | Naïve | 17.7 ± 1.8                | 43.4 ± 4.2       | 54.7 ± 2.4      |
|    | Sham  | 36.8 ± 3.2 <sup>a</sup>   | 47.6 ± 4.1       | 52.7 ± 4.2      |
|    | SNL   | 76.5 ± 1.8 <sup>a,b</sup> | 53.3 ± 1.7       | 51.9 ± 1.4      |
|    | CFA   | 28.2 ± 0.3 <sup>a</sup>   | 50.1 ± 3.2       | 65.5 ± 5.2      |

<sup>a</sup> Significantly different from naïve; <sup>b</sup> significantly different from sham

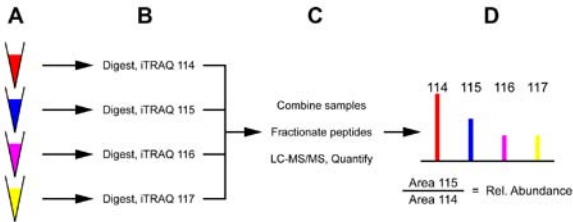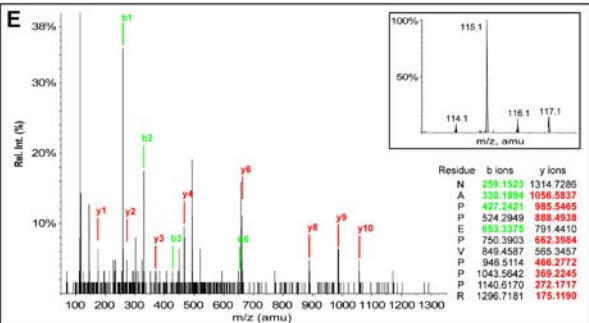

Supplemental Figure 1: Identification and relative quantification of VGF using iTRAQ. A, The four samples (cytoplasmic t0, cytoplasmic t24, nuclear t0, nuclear t24) were each digested with trypsin and labeled with an iTRAQ reagent (B). C, The peptide samples were combined and fractionated into fourteen fractions. Each fraction was then analyzed by LC-MS/MS to identify peptides and quantify the four iTRAQ labels. D, The relative iTRAQ label areas correspond to the relative peptide abundance. Relative protein abundance was calculated by ProteinPilot based on the abundance of all peptides mapped to a given protein. E, During MS/MS the peptide of 585.77 m/z ( $z = 2+$ ) was fragmented generating a spectrum of b-ions (containing the N-terminus of peptides) and y-ions (containing the C-terminus of peptides). In ProteinPilot, the masses of the b- and y-ions were used to deduce the amino acid sequence of the peptide as NAPPEVPPPR, corresponding to amino acids 489-499 of VGF (99% confidence of identification). The inset shows the iTRAQ reporter tags, which were fragmented from this peptide in the t0 (tag 114) and t24 (tag 115) samples. The ratio between the 114 and 115 tags was calculated as 1:45, indicating that the relative abundance of this VGF peptide was substantially increased at t24 and suggesting upregulation of the VGF protein.
